# Supplementary material
Source: publisher figshare collection journal article supplement (https://acs.figshare.com/ndownloader/files/4758124)
Supplement: Supplementary file 1 [file 4758124]

#######################################################################
#
#                 Cambridge Crystallographic Data Centre
#                                CCDC 
#
#######################################################################
#
# If this CIF has been generated directly or indirectly from an entry in the 
# Cambridge Structural Database, then it will include bibliographic, chemical, 
# crystal, experimental, refinement or atomic coordinate data resulting from 
# the CCDC's data processing and validation procedures. Files generated from 
# CSD entries are Copyright 2006 Cambridge Crystallographic Data Centre. They 
# may be used in bona fide research applications only, and may not be copied or 
# further disseminated in any form, whether machine-readable or not, except for 
# the purposes of generating routine backup copies on your local computer 
# system.
# 
# Files arising from any other source may also contain material that is the 
# copyright of third parties, including the originator, and you should check 
# with the originator concerning the permitted uses of the information 
# contained in this CIF.
#
# For further information on the CCDC and the free tools enCIFer and Mercury
# for validating and visualising CIF files, please visit www.ccdc.cam.ac.uk
#
#######################################################################

data_renum
_symmetry_cell_setting           monoclinic
_symmetry_space_group_name_H-M   'P 21/n'
_symmetry_Int_Tables_number      14
loop_
_symmetry_equiv_pos_site_id
_symmetry_equiv_pos_as_xyz
1 x,y,z
2 1/2-x,1/2+y,1/2-z
3 -x,-y,-z
4 1/2+x,1/2-y,1/2+z
_cell_length_a                   31.5094(18)
_cell_length_b                   12.6356(7)
_cell_length_c                   45.491(3)
_cell_angle_alpha                90
_cell_angle_beta                 92.890(3)
_cell_angle_gamma                90
_cell_volume                     18088.8
loop_
_atom_site_label
_atom_site_type_symbol
_atom_site_fract_x
_atom_site_fract_y
_atom_site_fract_z
Fe1 Fe 0.77630(4) -0.27150(8) 0.86564(3)
P101 P 0.72791(7) -0.14162(16) 0.87010(5)
P102 P 0.77406(7) -0.28381(16) 0.91545(5)
C101 C 0.7835(3) -0.3045(6) 0.81974(19)
C102 C 0.7432(3) -0.3497(6) 0.82704(19)
C103 C 0.7545(3) -0.4277(6) 0.85043(18)
C104 C 0.7982(3) -0.4277(6) 0.85615(18)
C105 C 0.8182(3) -0.3517(6) 0.83755(18)
C106 C 0.7904(3) -0.2269(6) 0.79540(18)
H10A H 0.82 -0.2093 0.7952
H10B H 0.7742 -0.1639 0.7985
H10C H 0.7814 -0.2579 0.7769
C107 C 0.7018(3) -0.3364(6) 0.81153(19)
H10D H 0.6808 -0.376 0.8214
H10E H 0.7032 -0.3617 0.7917
H10F H 0.6942 -0.2628 0.8113
C108 C 0.7229(3) -0.5062(6) 0.8616(2)
H10G H 0.6948 -0.4875 0.8543
H10H H 0.7241 -0.5051 0.8827
H10I H 0.7297 -0.576 0.8549
C109 C 0.8237(3) -0.5069(6) 0.87548(19)
H10J H 0.8533 -0.4888 0.8757
H10K H 0.8197 -0.5769 0.8677
H10L H 0.8141 -0.5044 0.8952
C110 C 0.8644(3) -0.3357(7) 0.8341(2)
H11A H 0.8684 -0.2798 0.8203
H11B H 0.8766 -0.3999 0.8271
H11C H 0.8779 -0.3172 0.8528
C111 C 0.7433(3) -0.1701(6) 0.92863(18)
H11D H 0.7149 -0.1936 0.9328
H11E H 0.7568 -0.1436 0.9468
C112 C 0.7401(3) -0.0800(6) 0.90582(18)
H11F H 0.7667 -0.0417 0.9056
H11G H 0.7178 -0.0308 0.9105
C113 C 0.7288(3) -0.0328(6) 0.84373(19)
C114 C 0.7513(3) 0.0590(7) 0.8496(2)
H114 H 0.7665 0.0678 0.8675
C115 C 0.7510(3) 0.1398(7) 0.8279(3)
H115 H 0.7663 0.2019 0.8315
C116 C 0.7283(3) 0.1265(8) 0.8018(3)
H116 H 0.7287 0.1796 0.7876
C117 C 0.7051(3) 0.0363(8) 0.7960(2)
H117 H 0.6895 0.0283 0.7782
C118 C 0.7054(3) -0.0432(7) 0.8173(2)
H118 H 0.6895 -0.1043 0.8137
C119 C 0.6716(3) -0.1704(6) 0.87166(18)
C120 C 0.6408(3) -0.0888(6) 0.86824(18)
H120 H 0.6498 -0.0199 0.8649
C121 C 0.5984(3) -0.1089(7) 0.8697(2)
H121 H 0.5786 -0.0547 0.8672
C122 C 0.5853(3) -0.2124(7) 0.87508(18)
H122 H 0.5565 -0.2265 0.8765
C123 C 0.6137(3) -0.2928(6) 0.87829(18)
H123 H 0.6044 -0.3611 0.8819
C124 C 0.6569(3) -0.2728(6) 0.87616(17)
H124 H 0.6761 -0.3285 0.8778
C125 C 0.8254(3) -0.2783(6) 0.93611(19)
C126 C 0.8635(3) -0.2942(6) 0.9221(2)
H126 H 0.8632 -0.3005 0.9018
C127 C 0.9022(3) -0.3004(7) 0.9388(2)
H127 H 0.9274 -0.3127 0.9296
C128 C 0.9024(3) -0.2884(9) 0.9685(2)
H128 H 0.928 -0.2933 0.9796
C129 C 0.8662(3) -0.2694(9) 0.9821(2)
H129 H 0.8671 -0.2589 1.0024
C130 C 0.8275(3) -0.2653(7) 0.9662(2)
H130 H 0.8027 -0.2536 0.9759
C131 C 0.7498(3) -0.4001(6) 0.93263(17)
C132 C 0.7066(3) -0.4099(6) 0.93390(19)
H132 H 0.6888 -0.3537 0.9284
C133 C 0.6894(3) -0.5062(7) 0.94361(19)
H133 H 0.6601 -0.5136 0.9442
C134 C 0.7152(3) -0.5888(6) 0.95212(18)
H134 H 0.7034 -0.6513 0.9588
C135 C 0.7576(3) -0.5801(7) 0.9509(2)
H135 H 0.7747 -0.6372 0.9567
C136 C 0.7768(3) -0.4863(7) 0.94104(18)
H136 H 0.8061 -0.4812 0.9401
C137 C 0.8163(2) -0.1589(6) 0.86705(18)
C138 C 0.8438(3) -0.0929(6) 0.86476(18)
C139 C 0.8792(3) -0.0272(7) 0.85937(18)
C140 C 0.9209(3) -0.0623(7) 0.8652(2)
H140 H 0.9254 -0.1285 0.8737
C141 C 0.9575(3) 0.0014(7) 0.8584(2)
H141 H 0.985 -0.0243 0.8614
C142 C 0.9497(3) 0.1032(8) 0.8469(2)
H142 H 0.9727 0.1463 0.8432
C143 C 0.9099(3) 0.1408(8) 0.8412(2)
H143 H 0.9061 0.2078 0.8331
C144 C 0.8736(3) 0.0783(7) 0.8476(2)
H144 H 0.8464 0.1056 0.8441
Ru1 Ru 0.91640(2) 0.09200(6) 0.887932(18)
C151 C 0.9396(4) 0.0684(8) 0.9338(2)
C152 C 0.9558(3) 0.1699(8) 0.9226(2)
C153 C 0.9195(4) 0.2364(8) 0.9153(3)
C154 C 0.8814(3) 0.1779(7) 0.9209(2)
C155 C 0.8947(3) 0.0775(7) 0.9323(2)
C156 C 0.9652(3) -0.0176(9) 0.9466(2)
H15A H 0.9948 -0.0025 0.9446
H15B H 0.9579 -0.0825 0.9366
H15C H 0.9598 -0.0245 0.9671
C157 C 1.0015(3) 0.1962(9) 0.9228(3)
H15D H 1.018 0.1352 0.9288
H15E H 1.0076 0.2531 0.9364
H15F H 1.0087 0.2175 0.9034
C158 C 0.9203(5) 0.3507(10) 0.9052(4)
H15G H 0.9492 0.3721 0.9029
H15H H 0.9078 0.3949 0.9195
H15I H 0.9045 0.3573 0.8867
C159 C 0.8367(4) 0.2204(9) 0.9165(3)
H15J H 0.8376 0.2904 0.9085
H15K H 0.8236 0.2225 0.9351
H15L H 0.8205 0.1751 0.9033
C160 C 0.8642(3) -0.0076(8) 0.9424(2)
H16A H 0.8354 0.0165 0.9391
H16B H 0.8697 -0.0212 0.963
H16C H 0.8682 -0.0714 0.9315
Fe2 Fe 0.21232(4) 0.92060(9) 0.58309(3)
P201 P 0.14920(8) 1.00523(16) 0.58355(5)
P202 P 0.18406(7) 0.81061(17) 0.61679(5)
C201 C 0.2547(3) 1.0609(7) 0.5828(2)
C202 C 0.2558(3) 1.0036(8) 0.5560(2)
C203 C 0.2706(3) 0.8995(8) 0.5632(2)
C204 C 0.2769(3) 0.8953(8) 0.5947(2)
C205 C 0.2653(3) 0.9937(8) 0.6069(2)
C206 C 0.2458(4) 1.1790(8) 0.5859(2)
H20A H 0.2393 1.2089 0.5668
H20B H 0.2704 1.2133 0.5947
H20C H 0.2221 1.189 0.5981
C207 C 0.2487(4) 1.0436(9) 0.5248(2)
H20D H 0.2515 0.9859 0.5113
H20E H 0.2694 1.0969 0.521
H20F H 0.2207 1.0733 0.5223
C208 C 0.2823(3) 0.8176(8) 0.5407(2)
H20G H 0.2913 0.7538 0.5507
H20H H 0.305 0.8442 0.5295
H20I H 0.258 0.8028 0.5278
C209 C 0.2995(3) 0.7991(9) 0.6101(2)
H20J H 0.303 0.7437 0.596
H20K H 0.2827 0.7737 0.6256
H20L H 0.3269 0.8207 0.6182
C210 C 0.2757(3) 1.0240(9) 0.6379(2)
H21A H 0.265 1.0937 0.6415
H21B H 0.306 1.0235 0.6416
H21C H 0.2629 0.9745 0.6508
C211 C 0.1109(3) 0.9037(6) 0.59343(17)
H21D H 0.0837 0.9359 0.5971
H21E H 0.1067 0.8529 0.5776
C212 C 0.1292(3) 0.8486(6) 0.62129(18)
H21F H 0.1124 0.7862 0.6252
H21G H 0.1277 0.896 0.638
C213 C 0.1384(3) 1.1108(6) 0.60988(19)
C214 C 0.1639(3) 1.1242(6) 0.6354(2)
H214 H 0.1886 1.0851 0.6387
C215 C 0.1507(4) 1.1998(8) 0.6561(2)
H215 H 0.1668 1.209 0.6737
C216 C 0.1144(4) 1.2604(7) 0.6509(2)
H216 H 0.1066 1.3097 0.6648
C217 C 0.0900(4) 1.2483(7) 0.6255(2)
H217 H 0.0659 1.2899 0.622
C218 C 0.1011(3) 1.1740(6) 0.6050(2)
H218 H 0.0842 1.165 0.5878
C219 C 0.1290(3) 1.0594(6) 0.54845(19)
C220 C 0.0929(3) 1.0216(7) 0.5338(2)
H220 H 0.0776 0.967 0.5419
C221 C 0.0793(3) 1.0647(7) 0.5068(2)
H221 H 0.0541 1.0411 0.4974
C222 C 0.1036(4) 1.1449(8) 0.4936(2)
H222 H 0.0957 1.1702 0.4749
C223 C 0.1388(4) 1.1845(7) 0.5086(2)
H223 H 0.1541 1.2395 0.5006
C224 C 0.1516(3) 1.1416(7) 0.53600(19)
H224 H 0.1756 1.1685 0.5461
C225 C 0.2075(3) 0.8009(7) 0.65398(19)
C226 C 0.2350(3) 0.7175(7) 0.6617(2)
H226 H 0.2397 0.665 0.6479
C227 C 0.2551(3) 0.7110(7) 0.6888(2)
H227 H 0.2728 0.6537 0.6934
C228 C 0.2495(3) 0.7904(7) 0.7098(2)
H228 H 0.2639 0.788 0.7281
C229 C 0.2224(3) 0.8703(7) 0.7026(2)
H229 H 0.2178 0.9226 0.7164
C230 C 0.2015(3) 0.8766(7) 0.6752(2)
H230 H 0.1832 0.9328 0.6711
C231 C 0.1816(3) 0.6718(6) 0.60607(18)
C232 C 0.2086(3) 0.6340(7) 0.5841(2)
H232 H 0.2251 0.6813 0.5739
C233 C 0.2103(3) 0.5259(7) 0.5780(2)
H233 H 0.2283 0.4995 0.5642
C234 C 0.1838(4) 0.4582(7) 0.5933(2)
H234 H 0.1846 0.3859 0.5896
C235 C 0.1565(3) 0.4964(7) 0.6140(2)
H235 H 0.1387 0.45 0.6234
C236 C 0.1560(3) 0.6003(7) 0.62045(19)
H236 H 0.1383 0.6249 0.6347
C237 C 0.1845(2) 0.8493(6) 0.55121(19)
C238 C 0.1681(3) 0.8067(6) 0.52930(19)
C239 C 0.1558(3) 0.7535(6) 0.50276(18)
C240 C 0.1279(3) 0.8066(6) 0.48069(17)
H240 H 0.1171 0.8732 0.4847
C241 C 0.1171(2) 0.7576(6) 0.45310(18)
H241 H 0.1008 0.793 0.4386
C242 C 0.1318(2) 0.6538(6) 0.44847(19)
H242 H 0.124 0.6201 0.4308
C243 C 0.1578(2) 0.5990(6) 0.46939(18)
H243 H 0.1677 0.5313 0.4655
C244 C 0.1686(2) 0.6493(6) 0.49649(18)
H244 H 0.1847 0.6122 0.5107
Ru2 Ru 0.09857(2) 0.65056(5) 0.488766(15)
C251 C 0.0600(3) 0.6220(8) 0.52612(19)
C252 C 0.0360(3) 0.6786(8) 0.5046(3)
C253 C 0.0317(3) 0.6171(11) 0.4795(2)
C254 C 0.0539(4) 0.5215(11) 0.4855(3)
C255 C 0.0707(3) 0.5238(7) 0.5141(3)
C256 C 0.0674(4) 0.6673(11) 0.5557(3)
H25A H 0.0843 0.6192 0.5677
H25B H 0.0407 0.6789 0.5644
H25C H 0.0822 0.7334 0.5543
C257 C 0.0135(5) 0.7821(9) 0.5064(5)
H25D H 0.0201 0.8139 0.5252
H25E H -0.0166 0.7708 0.5039
H25F H 0.0225 0.8281 0.4911
C258 C 0.0076(4) 0.6439(19) 0.4502(4)
H25G H 0.0101 0.586 0.4367
H25H H 0.0195 0.7065 0.4419
H25I H -0.0218 0.6559 0.4536
C259 C 0.0616(7) 0.4248(14) 0.4646(5)
H25J H 0.0476 0.4374 0.4457
H25K H 0.0504 0.3617 0.473
H25L H 0.0916 0.4164 0.4623
C260 C 0.0968(4) 0.4385(14) 0.5287(5)
H26A H 0.1046 0.459 0.5485
H26B H 0.122 0.4275 0.5181
H26C H 0.0806 0.3741 0.5288
Fe3 Fe -0.01471(4) 0.97198(8) 0.71646(3)
P301 P -0.06080(7) 0.89466(16) 0.74691(5)
P302 P 0.01923(7) 1.03280(16) 0.75833(5)
C301 C -0.0064(3) 1.1126(6) 0.68907(18)
C302 C -0.0503(3) 1.0903(6) 0.69231(17)
C303 C -0.0592(3) 0.9866(6) 0.67940(18)
C304 C -0.0198(2) 0.9455(6) 0.66997(17)
C305 C 0.0124(3) 1.0212(6) 0.67504(18)
C306 C 0.0142(3) 1.2155(6) 0.6954(2)
H30A H 0.0438 1.211 0.6916
H30B H 0.0112 1.2334 0.7157
H30C H 0.0009 1.2691 0.6832
C307 C -0.0838(3) 1.1695(6) 0.70082(19)
H30D H -0.1108 1.1346 0.7015
H30E H -0.0857 1.2253 0.6865
H30F H -0.076 1.1986 0.7198
C308 C -0.1023(3) 0.9424(7) 0.6724(2)
H30G H -0.1232 0.9853 0.6815
H30H H -0.1037 0.8714 0.6798
H30I H -0.1079 0.9421 0.6515
C309 C -0.0139(3) 0.8413(6) 0.65367(18)
H30J H -0.0401 0.8025 0.6529
H30K H 0.0079 0.8002 0.6638
H30L H -0.0058 0.8557 0.634
C310 C 0.0563(3) 1.0102(6) 0.66410(18)
H31A H 0.073 1.0709 0.6701
H31B H 0.0547 1.0054 0.643
H31C H 0.0694 0.9474 0.6722
C311 C -0.0414(2) 0.9139(6) 0.78518(17)
H31D H -0.0564 0.9726 0.7937
H31E H -0.0471 0.8508 0.7965
C312 C 0.0068(3) 0.9370(6) 0.78696(17)
H31F H 0.0224 0.8719 0.7842
H31G H 0.0151 0.9653 0.8062
C313 C -0.1169(2) 0.9325(6) 0.74768(18)
C314 C -0.1310(3) 1.0195(6) 0.76379(19)
H314 H -0.1114 1.0617 0.7743
C315 C -0.1746(3) 1.0426(7) 0.7640(2)
H315 H -0.1837 1.0972 0.7758
C316 C -0.2035(3) 0.9869(6) 0.7473(2)
H316 H -0.2321 1.0052 0.7469
C317 C -0.1899(3) 0.9017(6) 0.73079(18)
H317 H -0.2097 0.8633 0.7193
C318 C -0.1479(3) 0.8739(7) 0.73124(19)
H318 H -0.1396 0.8154 0.7205
C319 C -0.0666(2) 0.7507(6) 0.74171(18)
C320 C -0.0855(2) 0.6937(6) 0.76260(19)
H320 H -0.0919 0.7252 0.7803
C321 C -0.0954(3) 0.5878(7) 0.7574(2)
H321 H -0.1078 0.5482 0.7718
C322 C -0.0867(3) 0.5407(7) 0.7306(2)
H322 H -0.0943 0.4707 0.7269
C323 C -0.0665(3) 0.5996(7) 0.7095(2)
H323 H -0.0595 0.5685 0.6919
C324 C -0.0571(2) 0.7038(6) 0.71505(19)
H324 H -0.0443 0.7439 0.7008
C325 C 0.0057(3) 1.1607(6) 0.77534(17)
C326 C 0.0345(3) 1.2183(6) 0.79266(19)
H326 H 0.0625 1.1952 0.7951
C327 C 0.0220(3) 1.3121(6) 0.8068(2)
H327 H 0.0412 1.3496 0.819
C328 C -0.0194(3) 1.3467(7) 0.8021(2)
H328 H -0.0282 1.4085 0.8111
C329 C -0.0475(3) 1.2908(7) 0.7844(2)
H329 H -0.0752 1.3155 0.7815
C330 C -0.0357(3) 1.1977(6) 0.77058(18)
H330 H -0.0552 1.161 0.7584
C331 C 0.0767(3) 1.0339(6) 0.76051(19)
C332 C 0.0994(3) 1.0627(6) 0.73511(19)
H332 H 0.0843 1.0772 0.7175
C333 C 0.1430(3) 1.0693(6) 0.7363(2)
H333 H 0.1571 1.0896 0.7198
C334 C 0.1656(3) 1.0460(7) 0.7620(2)
H334 H 0.1951 1.0491 0.7625
C335 C 0.1453(3) 1.0178(7) 0.7873(2)
H335 H 0.1609 1.0041 0.8048
C336 C 0.1009(3) 1.0108(6) 0.7858(2)
H336 H 0.0872 0.9897 0.8024
C337 C 0.0271(3) 0.8661(6) 0.72177(18)
C338 C 0.0578(3) 0.8080(6) 0.72200(18)
C339 C 0.0955(2) 0.7457(6) 0.72201(17)
C340 C 0.0980(3) 0.6593(6) 0.70158(19)
H340 H 0.0753 0.6439 0.6884
C341 C 0.1362(3) 0.5974(7) 0.7020(2)
H341 H 0.138 0.5413 0.6888
C342 C 0.1700(4) 0.6185(7) 0.7211(2)
H342 H 0.1943 0.5768 0.7208
C344 C 0.1684(3) 0.7034(8) 0.7413(2)
H344 H 0.1915 0.7179 0.7542
C345 C 0.1312(3) 0.7656(6) 0.7416(2)
H345 H 0.1301 0.8212 0.7549
Ru3 Ru 0.11287(2) 0.59929(5) 0.747260(16)
C351 C 0.1037(3) 0.4340(6) 0.7599(2)
C352 C 0.1270(3) 0.4904(8) 0.7822(2)
C353 C 0.1005(3) 0.5736(7) 0.7934(2)
C354 C 0.0616(3) 0.5682(6) 0.77666(19)
C355 C 0.0634(3) 0.4846(7) 0.7562(2)
C356 C 0.1203(4) 0.3427(7) 0.7439(2)
H35A H 0.0988 0.3174 0.7299
H35B H 0.1279 0.2873 0.7576
H35C H 0.1449 0.3639 0.7337
C357 C 0.1722(4) 0.4670(10) 0.7949(3)
H35D H 0.1799 0.5184 0.8097
H35E H 0.1918 0.4704 0.7794
H35F H 0.173 0.3975 0.8035
C358 C 0.1128(4) 0.6501(10) 0.8183(2)
H35G H 0.1413 0.6354 0.8256
H35H H 0.0937 0.6417 0.8339
H35I H 0.1112 0.7215 0.8111
C359 C 0.0240(3) 0.6353(7) 0.7810(2)
H35J H 0.0016 0.6162 0.7669
H35K H 0.0314 0.7083 0.7784
H35L H 0.0146 0.625 0.8005
C360 C 0.0286(3) 0.4545(8) 0.7339(2)
H36A H 0.0377 0.3952 0.7226
H36B H 0.0225 0.5133 0.721
H36C H 0.0035 0.4358 0.7438
P41 P 0.24512(9) 0.3523(2) 0.69460(7)
F411 F 0.24373(19) 0.2917(5) 0.66437(13)
F412 F 0.29277(19) 0.3154(5) 0.70047(15)
F413 F 0.2290(2) 0.2469(5) 0.71060(16)
F414 F 0.2470(2) 0.4114(5) 0.72593(13)
F415 F 0.19677(18) 0.3872(4) 0.68938(14)
F416 F 0.2611(2) 0.4574(4) 0.67940(14)
P42 P 0.02471(8) 0.53081(17) 0.63587(5)
F421 F 0.04336(18) 0.4814(4) 0.60716(12)
F422 F 0.06611(15) 0.4881(4) 0.65411(11)
F423 F 0.00183(17) 0.4210(4) 0.64261(14)
F424 F 0.00730(17) 0.5788(4) 0.66537(11)
F425 F -0.01631(16) 0.5721(4) 0.61758(12)
F426 F 0.04867(16) 0.6399(4) 0.63016(11)
P43 P 0.25564(9) 0.40094(19) 0.49719(6)
F431 F 0.3034(2) 0.3874(6) 0.48955(18)
F432 F 0.2476(3) 0.2804(5) 0.49185(19)
F433 F 0.2694(2) 0.3744(5) 0.53051(13)
F434 F 0.20763(18) 0.4177(4) 0.50566(14)
F435 F 0.2636(2) 0.5224(4) 0.5035(2)
F436 F 0.2411(3) 0.4279(7) 0.46397(15)
P44 P 0.03440(8) 0.00032(19) 0.42284(5)
F441 F 0.05849(18) 0.0127(5) 0.39270(12)
F442 F 0.02989(17) -0.1237(4) 0.41693(12)
F443 F 0.07931(15) -0.0197(4) 0.44015(11)
F444 F 0.01031(16) -0.0115(4) 0.45281(11)
F445 F 0.03904(18) 0.1241(4) 0.42871(14)
F446 F -0.01059(16) 0.0192(5) 0.40578(12)
P45 P 0.82232(7) 0.36886(16) 0.78801(5)
F451 F 0.85376(15) 0.3612(3) 0.76178(10)
F452 F 0.83857(16) 0.2552(3) 0.79999(11)
F453 F 0.85915(14) 0.4235(3) 0.80863(10)
F454 F 0.79018(16) 0.3763(3) 0.81401(11)
F455 F 0.80698(16) 0.4829(3) 0.77669(11)
F456 F 0.78632(15) 0.3126(4) 0.76779(11)
P46 P 0.99731(17) 0.6688(4) 0.87285(10)
F461 F 1.0038(5) 0.5761(9) 0.8531(2)
F462 F 1.0464(4) 0.6809(11) 0.8760(4)
F463 F 1.0000(3) 0.5952(9) 0.8997(2)
F464 F 0.9944(3) 0.7765(10) 0.8946(2)
F465 F 0.9484(3) 0.6663(12) 0.8760(3)
F466 F 0.9939(7) 0.7450(11) 0.8466(2)

#END
